# Supplementary material for: Conserved non-coding elements: developmental gene regulation meets genome organization
Source: Oxford University Press journal article supplement (doi:10.1093/nar/gkx1074), 2017-10-24
Supplement: gkx1074_supp.pdf [file gkx1074_supp.pdf]

Supplementary Table 1: Nomenclature for various sets of conserved non-coding elements

| Abbreviation | Description                           | Identification                                                                                                                                                        | Reference |
|--------------|---------------------------------------|-----------------------------------------------------------------------------------------------------------------------------------------------------------------------|-----------|
| ANCOR        | Ancestral non-coding conserved region | various computational methods                                                                                                                                         | (1)       |
| CNC          | Conserved non-coding                  | $\geq 70\%$ seq. id. over 100 nucleotides between human and mouse; coding regions are removed                                                                         | (2)       |
| CNE          | Conserved non-coding elements         | local sequence similarity between human and <i>Fugu</i> for over 100 nucleotides; coding and repetitive regions are removed                                           | (3)       |
| CNEE         | Conserved non-exonic elements         | phastCons (a phylogenetic hidden markov model) was applied on multiple alignments of 40 vertebrate genomes                                                            | (4)       |
| CNG          | Conserved non-genic                   | $\geq 70\%$ seq. id. over 100 nucleotides between human and mouse; strictly non-coding                                                                                | (5)       |
| CNS          | Conserved non-coding sequences        | various computational methods                                                                                                                                         | (6)       |
| EC           | Extremely conserved elements          | $\geq 80\%$ seq. id. over 100 nucleotides in 40 vertebrate genomes                                                                                                    | (7)       |
| HCE          | Highly Conserved Elements             | union set of sequences identified in other studies: UCEs (8), UCR (9) and CNE (3)                                                                                     | (10)      |
| HCR          | Highly conserved regions              | $\geq 70\%$ seq. id. over 100 nucleotides between classes of vertebrates                                                                                              | (11)      |
| HCNE         | Highly conserved non-coding elements  | sequence stretches over 50 nucleotides, where the probability of being under negative selection given the conservation score in human and dog comparison, is over 95% | (12)      |
| HCNR         | Highly conserved non-coding regions   | $\geq 70\%$ seq. id. over 100 nucleotides in human, mouse, chicken, <i>Xenopus</i> and <i>Fugu</i> genomes; coding regions are removed                                | (13)      |
| LCNS         | Long conserved non-coding sequences   | long sequences ( $\geq 500$ nucleotides) showing $\geq 95\%$ similarity between human and mouse; coding regions are removed                                           | (14)      |
| LIME         | Long identical multispecies elements  | extremely conserved elements over 100 nucleotides for six animal and six large plant genomes                                                                          | (15)      |

|      |                                                |                                                                                                                                                                                                           |      |
|------|------------------------------------------------|-----------------------------------------------------------------------------------------------------------------------------------------------------------------------------------------------------------|------|
| MCS  | Multispecies conserved sequences               | conservation score threshold was set so that the detected sequences contain 5% of the human genome (rough estimate of the mammalian genome under selective pressure), minimum length being 25 nucleotides | (16) |
| PCNE | Phylogenetically Conserved non-coding elements | sequences with local sequence similarity for over 45 nucleotides between vertebrates and amphioxus; coding and repetitive regions are removed                                                             | (17) |
| UCE  | Ultraconserved elements                        | sequences having 100% similarity over 200 nucleotides between human, mouse and rat genomes; 25% of those overlap known protein-coding sequences                                                           | (8)  |
| UCR  | Ultraconserved regions                         | ≥ 95% similarity over 50 nucleotides between human and mouse genomes, also partially aligned to fugu; coding regions are removed                                                                          | (9)  |

## References

- Aloni,R. and Lancet,D. (2005) Conservation anchors in the vertebrate genome. *Genome Biol*, **6**, 115.
- Couronne,O., Poliakov,A., Bray,N., Ishkhanov,T., Ryaboy,D., Rubin,E., Pachter,L. and Dubchak,I. (2003) Strategies and tools for whole-genome alignments. *Genome Res*, **13**, 73–80.
- Woolfe,A., Goodson,M., Goode,D.K., Snell,P., McEwen,G.K., Vavouri,T., Smith,S.F., North,P., Callaway,H., Kelly,K., *et al.* (2005) Highly conserved non-coding sequences are associated with vertebrate development. *PLoS Biol*, **3**, e7.
- Lowe,C.B., Kellis,M., Siepel,A., Raney,B.J., Clamp,M., Salama,S.R., Kingsley,D.M., Lindblad-Toh,K. and Haussler,D. (2011) Three periods of regulatory innovation during vertebrate evolution. *Science*, **333**, 1019–1024.
- Dermitzakis,E.T., Reymond,A., Lyle,R., Scamuffa,N., Ucla,C., Deutsch,S., Stevenson,B.J., Flegel,V., Bucher,P., Jongeneel,C.V., *et al.* (2002) Numerous potentially functional but non-genic conserved sequences on human chromosome 21. *Nature*, **420**, 578–582.
- Dubchak,I., Brudno,M., Loots,G.G., Pachter,L., Mayor,C., Rubin,E.M. and Frazer,K.A. (2000) Active conservation of noncoding sequences revealed by three-way species comparisons. *Genome Res*, **10**, 1304–1306.
- Tseng,H.-H.E. and Tompa,M. (2009) Algorithms for locating extremely conserved elements in multiple sequence alignments. *BMC Bioinformatics*, **10**, 432.
- Bejerano,G., Pheasant,M., Makunin,I., Stephen,S., Kent,W.J., Mattick,J.S. and Haussler,D. (2004)

Ultraconserved elements in the human genome. *Science*, **304**, 1321–1325.

9. Sandelin,A., Bailey,P., Bruce,S., Engström,P.G., Klos,J.M., Wasserman,W.W., Ericson,J. and Lenhard,B. (2004) Arrays of ultraconserved non-coding regions span the loci of key developmental genes in vertebrate genomes. *BMC Genomics*, **5**, 99.
10. Sun,H., Skogerbø,G. and Chen,R. (2006) Conserved distances between vertebrate highly conserved elements. *Hum Mol Genet*, **15**, 2911–2922.
11. Duret,L., Dorkeld,F. and Gautier,C. (1993) Strong conservation of non-coding sequences during vertebrates evolution: potential involvement in post-transcriptional regulation of gene expression. *Nucleic Acids Res*, **21**, 2315–2322.
12. Lindblad-Toh,K., Wade,C.M., Mikkelsen,T.S., Karlsson,E.K., Jaffe,D.B., Kamal,M., Clamp,M., Chang,J.L., Kulbokas,E.J., Zody,M.C., *et al.* (2005) Genome sequence, comparative analysis and haplotype structure of the domestic dog. *Nature*, **438**, 803–819.
13. de la Calle-Mustienes,E., Feijóo,C.G., Manzanares,M., Tena,J.J., Rodríguez-Seguel,E., Letizia,A., Allende,M.L. and Gómez-Skarmeta,J.L. (2005) A functional survey of the enhancer activity of conserved non-coding sequences from vertebrate Iroquois cluster gene deserts. *Genome Res*, **15**, 1061–1072.
14. Sakuraba,Y., Kimura,T., Masuya,H., Noguchi,H., Sezutsu,H., Takahasi,K.R., Toyoda,A., Fukumura,R., Murata,T., Sakaki,Y., *et al.* (2008) Identification and characterization of new long conserved noncoding sequences in vertebrates. *Mamm Genome*, **19**, 703–712.
15. Reneker,J., Lyons,E., Conant,G.C., Pires,J.C., Freeling,M., Shyu,C.-R. and Korkin,D. (2012) Long identical multispecies elements in plant and animal genomes. *Proc Natl Acad Sci U S A*, **109**, E1183-91.
16. Margulies,E.H., Blanchette,M., NISC Comparative Sequencing Program, Haussler,D. and Green,E.D. (2003) Identification and characterization of multi-species conserved sequences. *Genome Res*, **13**, 2507–2518.
17. Hufton,A.L., Mathia,S., Braun,H., Georgi,U., Lehrach,H., Vingron,M., Poustka,A.J. and Panopoulou,G. (2009) Deeply conserved chordate noncoding sequences preserve genome synteny but do not drive gene duplicate retention. *Genome Res*, **19**, 2036–2051.
